# Supplementary material for: Water adsorption and hygroscopic growth of six anemophilous pollen species: the effect of temperature
Source: Copernicus journal article supplement (doi:10.5194/acp-2018-1118), 2018-11-19
Supplement: Supplementary file 1 [file acp-2018-1118-supplement.pdf]

1 Supplements of

2 **Water adsorption and hygroscopic growth of six anemophilous pollen species: the**  
3 **effect of temperature**

4

5 \* Correspondence: Mingjin Tang ([mingjintang@gig.ac.cn](mailto:mingjintang@gig.ac.cn))

6

7 **Table S1.** Sample mass (normalized to that at 0% RH) as a function of RH at three different  
 8 temperatures (37, 25 and 5 °C) for populus deltoides pollen and populus tremuloides pollen. All  
 9 the errors ( $\pm 1 \sigma$ ) are statistical only.

| RH (%)          | populus deltoides |             |             | populus tremuloides |             |             |
|-----------------|-------------------|-------------|-------------|---------------------|-------------|-------------|
|                 | 37 °C             | 25 °C       | 5 °C        | 37 °C               | 25 °C       | 5 °C        |
| 0 <sup>a</sup>  | 1.000             | 1.000       | 1.000       | 1.000               | 1.000       | 1.000       |
| 5 <sup>b</sup>  | 1.008             | 1.008       | 1.007       | 1.004               | 1.006       | 1.001       |
| 10              | 1.014±0.001       | 1.013±0.002 | 1.012±0.004 | 1.010±0.011         | 1.008±0.004 | 1.002±0.001 |
| 15 <sup>b</sup> | 1.020             | 1.021       | 1.020       | 1.016               | 1.019       | 1.006       |
| 20              | 1.024±0.002       | 1.024±0.004 | 1.024±0.006 | 1.022±0.002         | 1.021±0.004 | 1.010±0.004 |
| 25 <sup>b</sup> | 1.030             | 1.032       | 1.033       | 1.035               | 1.033       | 1.016       |
| 30              | 1.035±0.001       | 1.035±0.003 | 1.036±0.008 | 1.038±0.005         | 1.037±0.003 | 1.019±0.004 |
| 35 <sup>b</sup> | 1.042             | 1.044       | 1.048       | 1.054               | 1.049       | 1.024       |
| 40              | 1.050±0.003       | 1.051±0.001 | 1.057±0.004 | 1.058±0.007         | 1.058±0.002 | 1.044±0.009 |
| 45 <sup>b</sup> | 1.057             | 1.059       | 1.074       | 1.079               | 1.070       | 1.041       |
| 50              | 1.070±0.008       | 1.072±0.006 | 1.085±0.006 | 1.084±0.009         | 1.085±0.002 | 1.085±0.008 |
| 55 <sup>b</sup> | 1.077             | 1.079       | 1.108       | 1.112               | 1.099       | 1.110       |
| 60              | 1.098±0.014       | 1.104±0.015 | 1.123±0.013 | 1.121±0.011         | 1.122±0.004 | 1.126±0.009 |
| 65 <sup>b</sup> | 1.109             | 1.110       | 1.156       | 1.159               | 1.144       | 1.159       |
| 70              | 1.144±0.022       | 1.154±0.025 | 1.181±0.021 | 1.176±0.012         | 1.181±0.005 | 1.190±0.010 |
| 75 <sup>b</sup> | 1.164             | 1.170       | 1.233       | 1.231               | 1.218       | 1.238       |
| 80              | 1.226±0.033       | 1.246±0.041 | 1.288±0.038 | 1.273±0.012         | 1.284±0.007 | 1.308±0.012 |
| 85 <sup>b</sup> | 1.276             | 1.297       | 1.401       | 1.373               | 1.368       | 1.405       |
| 90              | 1.427±0.060       | 1.476±0.094 | 1.597±0.100 | 1.514±0.015         | 1.549±0.018 | 1.649±0.051 |
| 95 <sup>b</sup> | 1.986±            | 2.045       | 2.340       | 1.872               | 1.923       | 2.267       |

10 a: Sample mass was normalized to that at 0% RH, and therefore the uncertainty for the data at 0% RH was  
 11 not reported.

12 b: Only one measurement was carried out at each of these RH, and therefore the uncertainties were not  
 13 reported.

14

15 **Table S2.** Sample mass (normalized to that at 0% RH) as a function of RH at different temperatures  
 16 for ragweed pollen (37, 25 and 5 °C) and corn pollen (37, 25, and 15 °C). All the errors ( $\pm 1 \sigma$ ) are  
 17 statistical only.

| RH (%)          | ragweed           |                   |                   | corn              |                   |                   |
|-----------------|-------------------|-------------------|-------------------|-------------------|-------------------|-------------------|
|                 | 37 °C             | 25 °C             | 5 °C              | 37 °C             | 25 °C             | 15 °C             |
| 0 <sup>a</sup>  | 1.000             | 1.000             | 1.000             | 1.000             | 1.000             | 1.000             |
| 5 <sup>b</sup>  | 1.006             | 1.005             | 1.003             | 1.001             | 1.004             | 1.000             |
| 10              | 1.011 $\pm$ 0.002 | 1.011 $\pm$ 0.002 | 1.012 $\pm$ 0.007 | 1.005 $\pm$ 0.002 | 1.009 $\pm$ 0.001 | 1.002 $\pm$ 0.001 |
| 15 <sup>b</sup> | 1.016             | 1.015             | 1.011             | 1.006             | 1.013             | 1.002             |
| 20              | 1.020 $\pm$ 0.003 | 1.021 $\pm$ 0.005 | 1.021 $\pm$ 0.008 | 1.015 $\pm$ 0.003 | 1.018 $\pm$ 0.001 | 1.011 $\pm$ 0.006 |
| 25 <sup>b</sup> | 1.026             | 1.025             | 1.020             | 1.018             | 1.025             | 1.009             |
| 30              | 1.029 $\pm$ 0.003 | 1.031 $\pm$ 0.005 | 1.030 $\pm$ 0.006 | 1.028 $\pm$ 0.003 | 1.030 $\pm$ 0.002 | 1.025 $\pm$ 0.007 |
| 35 <sup>b</sup> | 1.036             | 1.039             | 1.036             | 1.035             | 1.041             | 1.029             |
| 40              | 1.040 $\pm$ 0.002 | 1.045 $\pm$ 0.006 | 1.043 $\pm$ 0.001 | 1.047 $\pm$ 0.002 | 1.046 $\pm$ 0.003 | 1.048 $\pm$ 0.010 |
| 45 <sup>b</sup> | 1.048             | 1.056             | 1.055             | 1.061             | 1.058             | 1.047             |
| 50              | 1.053 $\pm$ 0.002 | 1.061 $\pm$ 0.007 | 1.060 $\pm$ 0.009 | 1.072 $\pm$ 0.004 | 1.067 $\pm$ 0.002 | 1.076 $\pm$ 0.006 |
| 55 <sup>b</sup> | 1.064             | 1.078             | 1.080             | 1.093             | 1.083             | 1.081             |
| 60              | 1.074 $\pm$ 0.001 | 1.082 $\pm$ 0.009 | 1.083 $\pm$ 0.017 | 1.105 $\pm$ 0.006 | 1.099 $\pm$ 0.002 | 1.112 $\pm$ 0.005 |
| 65 <sup>b</sup> | 1.086             | 1.108             | 1.113             | 1.134             | 1.121             | 1.132             |
| 70              | 1.100 $\pm$ 0.002 | 1.114 $\pm$ 0.012 | 1.115 $\pm$ 0.015 | 1.152 $\pm$ 0.008 | 1.147 $\pm$ 0.001 | 1.161 $\pm$ 0.012 |
| 75 <sup>b</sup> | 1.119             | 1.151             | 1.156             | 1.195             | 1.189             | 1.199             |
| 80              | 1.148 $\pm$ 0.002 | 1.167 $\pm$ 0.014 | 1.177 $\pm$ 0.024 | 1.231 $\pm$ 0.010 | 1.243 $\pm$ 0.002 | 1.253 $\pm$ 0.013 |
| 85 <sup>b</sup> | 1.188             | 1.234             | 1.253             | 1.311             | 1.318             | 1.332             |
| 90              | 1.249 $\pm$ 0.002 | 1.293 $\pm$ 0.028 | 1.338 $\pm$ 0.036 | 1.406 $\pm$ 0.015 | 1.456 $\pm$ 0.007 | 1.488 $\pm$ 0.017 |
| 95 <sup>b</sup> | 1.473             | 1.566             | 1.776             | 1.691             | 1.813             | 1.920             |

18 a: Sample mass was normalized to that at 0% RH, and therefore the uncertainty for the data at 0% RH was  
 19 not reported.

20 b: Only one measurement was carried out at each of these RH, and therefore the uncertainties were not  
 21 reported.

22

23 **Table S3.** Sample mass (normalized to that at 0% RH) as a function of RH at different temperatures  
 24 (37, 25, and 5 °C) for pecan pollen and paper mulberry pollen. All the errors ( $\pm 1 \sigma$ ) are statistical  
 25 only.

| RH (%)          | pecan             |                   |                   | paper mulberry    |                   |                   |
|-----------------|-------------------|-------------------|-------------------|-------------------|-------------------|-------------------|
|                 | 37 °C             | 25 °C             | 15 °C             | 37 °C             | 25 °C             | 15 °C             |
| 0 <sup>a</sup>  | 1.000             | 1.000             | 1.000             | 1.000             | 1.000             | 1.000             |
| 5 <sup>b</sup>  | 1.003             | 1.005             | 1.002             |                   |                   |                   |
| 10              | 1.008 $\pm$ 0.002 | 1.008 $\pm$ 0.004 | 1.004 $\pm$ 0.003 | 1.011 $\pm$ 0.001 | 1.014 $\pm$ 0.001 | 1.013 $\pm$ 0.001 |
| 15 <sup>b</sup> | 1.011             | 1.014             | 1.008             |                   |                   |                   |
| 20              | 1.016 $\pm$ 0.001 | 1.015 $\pm$ 0.004 | 1.015 $\pm$ 0.001 | 1.021 $\pm$ 0.001 | 1.024 $\pm$ 0.001 | 1.024 $\pm$ 0.001 |
| 25 <sup>b</sup> | 1.020             | 1.021             | 1.021             |                   |                   |                   |
| 30              | 1.026 $\pm$ 0.002 | 1.023 $\pm$ 0.003 | 1.027 $\pm$ 0.001 | 1.033 $\pm$ 0.001 | 1.034 $\pm$ 0.001 | 1.037 $\pm$ 0.001 |
| 35 <sup>b</sup> | 1.031             | 1.029             | 1.035             |                   |                   |                   |
| 40              | 1.038 $\pm$ 0.002 | 1.032 $\pm$ 0.003 | 1.041 $\pm$ 0.003 | 1.050 $\pm$ 0.001 | 1.046 $\pm$ 0.001 | 1.054 $\pm$ 0.001 |
| 45 <sup>b</sup> | 1.047             | 1.041             | 1.052             |                   |                   |                   |
| 50              | 1.054 $\pm$ 0.002 | 1.046 $\pm$ 0.003 | 1.058 $\pm$ 0.005 | 1.073 $\pm$ 0.001 | 1.065 $\pm$ 0.001 | 1.077 $\pm$ 0.001 |
| 55 <sup>b</sup> | 1.067             | 1.056             | 1.075             |                   |                   |                   |
| 60              | 1.076 $\pm$ 0.004 | 1.064 $\pm$ 0.002 | 1.081 $\pm$ 0.009 | 1.103 $\pm$ 0.001 | 1.095 $\pm$ 0.001 | 1.111 $\pm$ 0.001 |
| 65 <sup>b</sup> | 1.096             | 1.077             | 1.108             |                   |                   |                   |
| 70              | 1.108 $\pm$ 0.007 | 1.089 $\pm$ 0.002 | 1.116 $\pm$ 0.013 | 1.148 $\pm$ 0.004 | 1.139 $\pm$ 0.001 | 1.163 $\pm$ 0.001 |
| 75 <sup>b</sup> | 1.141             | 1.108             | 1.161             |                   |                   |                   |
| 80              | 1.161 $\pm$ 0.013 | 1.132 $\pm$ 0.002 | 1.179 $\pm$ 0.022 | 1.226 $\pm$ 0.004 | 1.221 $\pm$ 0.003 | 1.255 $\pm$ 0.001 |
| 85 <sup>b</sup> | 1.230             | 1.171             | 1.275             |                   |                   |                   |
| 90              | 1.314 $\pm$ 0.017 | 1.303 $\pm$ 0.004 | 1.358 $\pm$ 0.050 | 1.418 $\pm$ 0.017 | 1.473 $\pm$ 0.001 | 1.515 $\pm$ 0.001 |
| 95 <sup>b</sup> | 1.574             | 1.716             | 1.927             |                   |                   |                   |

26 a: Sample mass was normalized to that at 0% RH, and therefore the uncertainty for the data at 0% RH was  
 27 not reported.

28 b: Only one measurement was carried out at each of these RH, and therefore the uncertainties were not  
 29 reported.

30

31

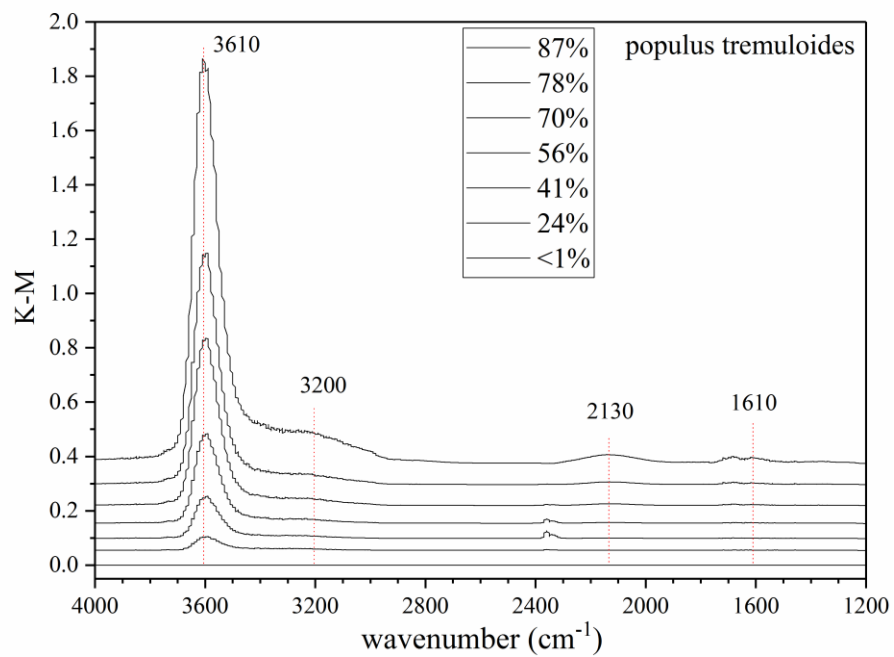

32

33 **Figure S1.** In-situ DRIFTS spectra of populus deltoides pollen as a function of RH at 25 °C,  
34 relative to that at <1% RH.

35

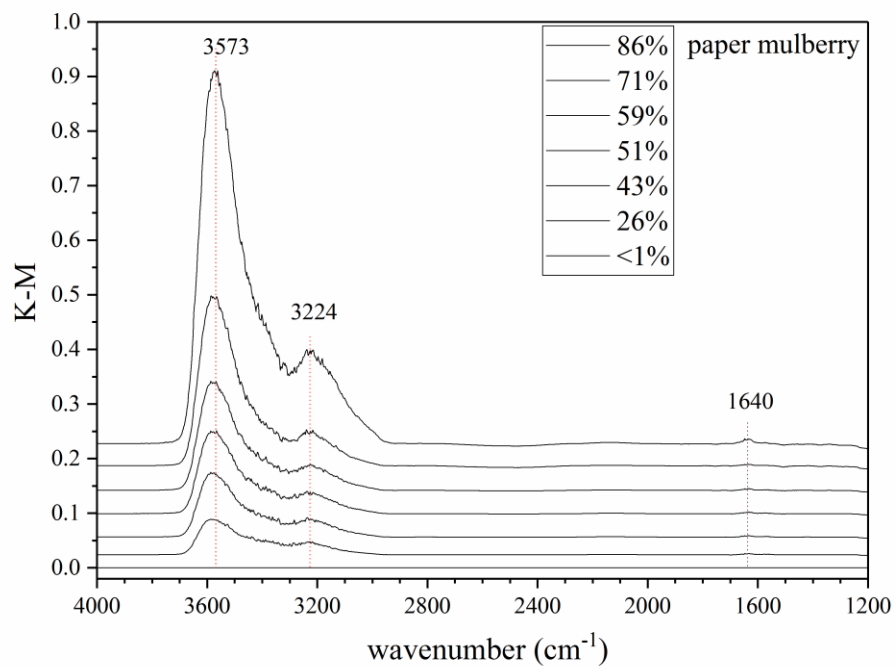

36

37 **Figure S2.** In-situ DRIFTS spectra of paper mulberry pollen as a function of RH at 25 °C, relative

38 to that at <1% RH.

39

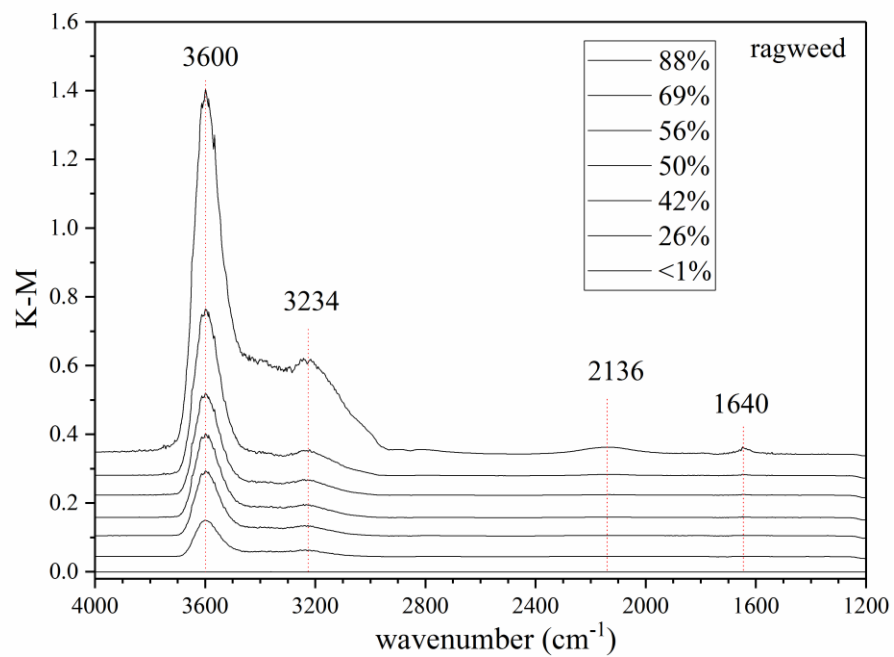

40

41 **Figure S3.** In-situ DRIFTS spectra of ragweed pollen as a function of RH at 25 °C, relative to that

42 at <1% RH.

43

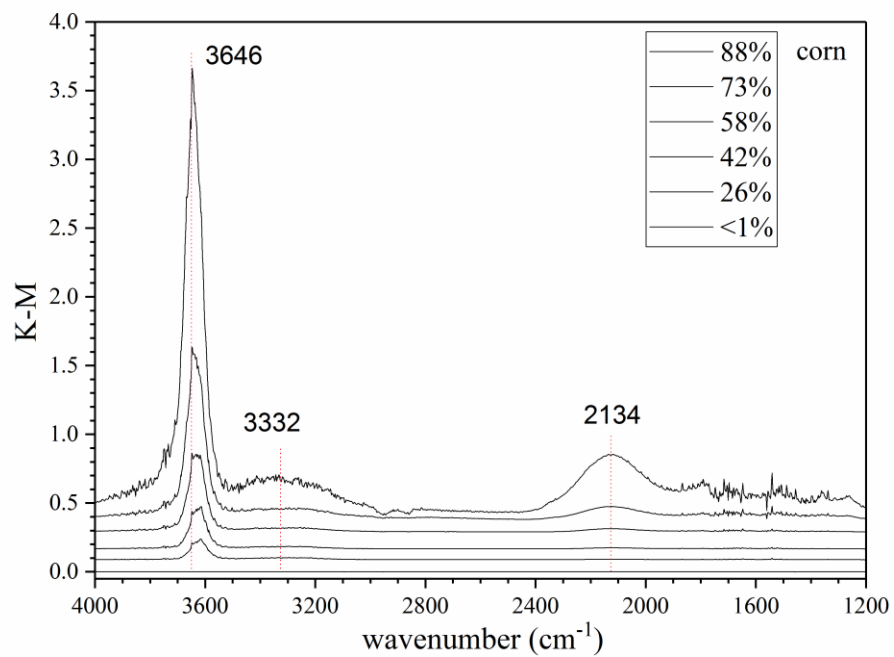

44

45 **Figure S4.** In-situ DRIFTS spectra of corn pollen as a function of RH at 25 °C, relative to that at

46 <1% RH.

47



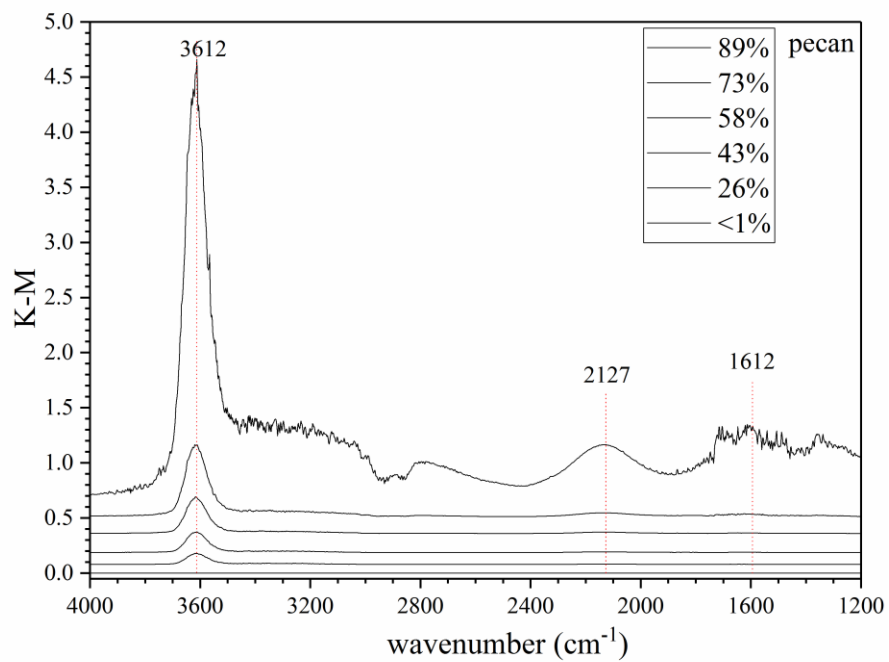

48

49 **Figure S5.** In-situ DRIFTS spectra of pecan pollen as a function of RH at 25 °C, relative to that at

50 <1% RH.

51
